# Supplementary material
Source: MDPI journal article supplement (https://www.mdpi.com/2073-4441/14/8/1296)
Supplement: s1 [file s1]

## **Supplementary information**

### **Ranking three Water Sensitive Urban Design (WSUD) practices based on hydraulic and water quality treatment performance: Implications for effective stormwater treatment design**

An Liu<sup>1\*</sup>, Prasanna Egodawatta<sup>2</sup> and Ashantha Goonetilleke<sup>2</sup>

<sup>1</sup>College of Chemistry and Environmental Engineering, Shenzhen University,  
Shenzhen 518060, P. R. China

<sup>2</sup>Faculty of Engineering, Queensland University of Technology (QUT), P.O. Box  
2434, Brisbane, QLD 4001, Australia

\*Corresponding author

An Liu

E-mail: liuan@szu.edu.cn; Tel: 86-755-26557315; Fax: 86-755-26536141

**Table S1(a) Characteristics of rainfall events selected and hydraulic performance of the bioretention basin**

| Sampling date | Rainfall events selected | Antecedent dry hours | rainfall depth (mm) | 30min intensity (mm/h) | Peak flow reduction% | Volume reduction% |
|---------------|--------------------------|----------------------|---------------------|------------------------|----------------------|-------------------|
| 10/25/2007    | B1                       | 318                  | 22.4                | 16                     | 92.57                | 38.03             |
| 10/31/2007    | B2*                      | 63                   | 8.4                 | 14                     | 92.50                | 44.83             |
| 11/6/2007     | B3                       | 122                  | 4.6                 | 4                      | 90.00                | 92.86             |
| 11/7/2007     | B4                       | 30                   | 25.4                | 36                     | 74.55                | 6.90              |
| 11/11/2007    | B5                       | 63                   | 7.2                 | 14                     | 92.50                | 52.63             |
| 11/17/2007    | B6*                      | 119                  | 7                   | 10                     | 91.18                | 77.27             |
| 12/1/2007     | B7                       | 126                  | 18                  | 32                     | 95.67                | 25.00             |
| 12/8/2007     | B8*                      | 59                   | 8.4                 | 10                     | 95.13                | 51.85             |
| 1/29/2008     | B9*                      | 207                  | 20.2                | 16                     | 95.12                | 38.46             |
| 3/5/2008      | B10*                     | 231                  | 1.8                 | 10                     | 100.00               | 100.00            |
| 3/8/2008      | B11*                     | 42                   | 1                   | 8                      | 100.00               | 100.00            |
| 3/17/2008     | B12*                     | 220                  | 11.2                | 16                     | 91.74                | 65.52             |
| 4/5/2008      | B13*                     | 216                  | 6                   | 10                     | 100.00               | 100.00            |
| 4/17/2008     | B14                      | 167                  | 16.4                | 14                     | 89.41                | 26.67             |
| 5/14/2008     | B15*                     | 632                  | 3.6                 | 12                     | 100.00               | 100.00            |
| 5/29/2008     | B16                      | 951                  | 42.8                | 32                     | 94.49                | 26.12             |
| 10/9/2008     | B17*                     | 598                  | 21.8                | 30                     | 95.00                | 31.43             |
| 12/29/2008    | B18*                     | 26                   | 14.4                | 18                     | 96.46                | 16.67             |
| 1/22/2009     | B19                      | 315                  | 50                  | 46                     | 96.10                | 9.86              |
| 2/11/2009     | B20*                     | 361                  | 6.2                 | 16                     | 96.49                | 70.00             |
| 2/14/2009     | B21                      | 68                   | 63.2                | 48                     | 96.38                | 3.82              |
| 3/16/2009     | B22                      | 51                   | 25                  | 38                     | 96.67                | 11.24             |

\*Rainfall events selected for water quality analysis because only these events have complete water quality data required for this study.

**Table S1(b) Characteristics of rainfall events selected and hydraulic performance of the constructed wetland**

| Sampling date | Rainfall events selected | Antecedent dry hours | rainfall depth (mm) | 30min intensity (mm/h) | Peak flow reduction% | Volume reduction% |
|---------------|--------------------------|----------------------|---------------------|------------------------|----------------------|-------------------|
| 3/8/2008      | W1*                      | 231                  | 1.8                 | 8                      | 98.51                | 22.50             |
| 3/17/2008     | W2*                      | 220                  | 11.2                | 16                     | 98.61                | 3.63              |
| 4/5/2008      | W3*                      | 216                  | 6                   | 10                     | 98.25                | -8.70             |
| 4/17/2008     | W4*                      | 167                  | 16.4                | 14                     | 98.21                | 2.41              |
| 5/14/2008     | W5*                      | 632                  | 3.6                 | 12                     | 98.61                | 60.87             |
| 5/29/2008     | W6*                      | 951                  | 42.8                | 32                     | 99.18                | 52.04             |
| 5/31/2008     | W7                       | 14                   | 92.6                | 46                     | 98.57                | 68.54             |
| 11/16/2008    | W8                       | 696                  | 31.2                | 22                     | 98.68                | 35.69             |
| 11/25/2008    | W9                       | 119                  | 93.6                | 54                     | 99.55                | 82.07             |
| 12/29/2008    | W10                      | 26                   | 14.4                | 18                     | 99.59                | 21.70             |
| 1/3/2009      | W11                      | 122                  | 8.6                 | 14                     | 99.32                | 6.02              |
| 1/22/2009     | W12                      | 315                  | 50                  | 46                     | 99.45                | 55.13             |
| 2/11/2009     | W13*                     | 361                  | 6.2                 | 16                     | 99.54                | 11.57             |
| 2/17/2009     | W14                      | 8                    | 4                   | 8                      | 96.67                | -14.81            |
| 3/4/2009      | W15                      | 133                  | 3.2                 | 10                     | 98.51                | 40.68             |
| 3/16/2009     | W16                      | 51                   | 25                  | 34                     | 99.49                | 52.00             |
| 5/6/2009      | W17                      | 105                  | 16                  | 14                     | 97.53                | 11.55             |

\*Rainfall events selected for water quality analysis because only these events have complete water quality data required for this study.

**Table S1(c) Characteristics of rainfall events selected and hydraulic performance of the roadside swale**

| Sampling date | Rainfall events selected | Antecedent dry hours | rainfall depth (mm) | 30min intensity (mm/h) | Peak flow reduction% | Volume reduction% |
|---------------|--------------------------|----------------------|---------------------|------------------------|----------------------|-------------------|
| 1/29/2008     | S1                       | 207                  | 20                  | 16                     | 60.32                | 15.79             |
| 3/5/2008      | S2*                      | 231                  | 1.8                 | 10                     | 90.91                | 75.00             |
| 3/8/2008      | S3                       | 42                   | 1                   | 8                      | 100.00               | 100.00            |
| 3/10/2008     | S4*                      | 36                   | 2.4                 | 10                     | 80.00                | 54.55             |
| 3/17/2008     | S5                       | 220                  | 11.2                | 16                     | 62.65                | 21.43             |
| 4/5/2008      | S6                       | 216                  | 6                   | 10                     | 62.22                | 28.57             |
| 4/17/2008     | S7*                      | 167                  | 16.4                | 14                     | 74.17                | 22.22             |
| 5/14/2008     | S8*                      | 632                  | 3.6                 | 12                     | 89.52                | 88.24             |
| 5/29/2008     | S9                       | 951                  | 42.8                | 32                     | 19.72                | -11.93            |
| 12/29/2008    | S10*                     | 26                   | 14.4                | 18                     | 43.88                | 14.71             |
| 1/22/2009     | S11*                     | 315                  | 50                  | 46                     | 17.47                | -8.27             |
| 2/11/2009     | S12                      | 361                  | 6.2                 | 16                     | 81.92                | 46.43             |
| 3/16/2009     | S13*                     | 51                   | 25                  | 38                     | 38.48                | -3.28             |

\*Rainfall events selected for water quality analysis because only these events have complete water quality data required for this study.

**Table S2(a) Water quality performance of the bioretention basin**

| Rainfall events selected | TSS                |                      | TN                 |                      | TP                 |                      |
|--------------------------|--------------------|----------------------|--------------------|----------------------|--------------------|----------------------|
|                          | Outflow EMC (mg/L) | Outflow load (kg/ha) | Outflow EMC (mg/L) | Outflow load (kg/ha) | Outflow EMC (mg/L) | Outflow load (kg/ha) |
| B2                       | 24.3               | 0.59                 | 1.6                | 0.039                | 0.108              | 0.003                |
| B6                       | 12.1               | 0.09                 | 1.14               | 0.009                | 0.113              | 0.001                |
| B8                       | 39                 | 0.78                 | 1.83               | 0.036                | 0.2                | 0.004                |
| B9                       | 24.5               | 1.21                 | 1.16               | 0.057                | 0.098              | 0.005                |
| B10                      | -*                 | 0                    | -                  | 0                    | -                  | 0                    |
| B11                      | -                  | 0                    | -                  | 0                    | -                  | 0                    |
| B12                      | 57.3               | 0.92                 | 2.19               | 0.035                | 0.163              | 0.003                |
| B13                      | -                  | 0                    | -                  | 0                    | -                  | 0                    |
| B15                      | -                  | 0                    | -                  | 0                    | -                  | 0                    |
| B17                      | 20                 | 1.46                 | 1.35               | 0.098                | 0.104              | 0.008                |
| B18                      | 24.4               | 1.49                 | 1.26               | 0.077                | 0.132              | 0.008                |
| B20                      | 25.7               | 0.25                 | 1.38               | 0.014                | 0.179              | 0.002                |

\*no data due to sampling failure

**Table S2(b) Water quality performance of the constructed wetland**

| Rainfall events selected | TSS                |                      | TN                 |                      | TP                 |                      |
|--------------------------|--------------------|----------------------|--------------------|----------------------|--------------------|----------------------|
|                          | Outflow EMC (mg/L) | Outflow load (kg/ha) | Outflow EMC (mg/L) | Outflow load (kg/ha) | Outflow EMC (mg/L) | Outflow load (kg/ha) |
| W1                       | 9                  | 0.05                 | 0.89               | 0.004                | 0.167              | 0.001                |
| W2                       | 15.4               | 0.6                  | 0.75               | 0.029                | 0.101              | 0.004                |
| W3                       | 6.4                | 0.08                 | 0.37               | 0.005                | 0.034              | 0                    |
| W4                       | 8.7                | 0.72                 | 0.47               | 0.039                | 0.023              | 0.002                |
| W5                       | 16.3               | 0.05                 | 0.56               | 0.002                | 0.025              | 0                    |
| W6                       | 11.4               | -                    | 0.46               | -                    | 0.052              | -                    |
| W13                      | 15.7               | 0.32                 | 0.75               | 0.015                | 0.066              | 0.001                |

**Table S2(c) Water quality performance of the roadside swale**

| Rainfall events selected | TSS                |                      | TN                 |                      | TP                 |                      |
|--------------------------|--------------------|----------------------|--------------------|----------------------|--------------------|----------------------|
|                          | Outflow EMC (mg/L) | Outflow load (kg/ha) | Outflow EMC (mg/L) | Outflow load (kg/ha) | Outflow EMC (mg/L) | Outflow load (kg/ha) |
| S2                       | 5.6                | 0.011                | 0.69               | 0                    | 0.072              | 0                    |
| S4                       | 5                  | 0.016                | 0.36               | 0                    | 0.02               | 0                    |
| S7                       | 10.3               | 0.524                | 0.57               | 0.03                 | 0.061              | 0.03                 |
| S8                       | 23                 | 0.058                | 1.02               | 0                    | 0.105              | 0                    |
| S10                      | 13.5               | 0.874                | 1.11               | 0.07                 | 0.18               | 0.011                |
| S11                      | 10.9               | 3.026                | 0.67               | 0.19                 | 0.056              | 0.015                |
| S13                      | 9.9                | 1.264                | 1.17               | 0.15                 | 0.087              | 0.011                |

## **Pollutants testing methods**

### **TSS testing**

TSS concentration/load was measured by filtering a 20 mL volume of sample through a 1 µm glass-fibre filter paper and measuring the weight of the residue retained on it. The filter papers were pre-washed using deionised water and oven dried before use. Samples were filtered through the pre-weighed filter papers and the filter paper together with the residue retained was oven dried at 103-105 °C. The increase in weight of the filter paper was determined to obtain the TSS weight in the volume filtered. The method complied with the Standards Methods for Water and Wastewater Method No. 2540 D (APHA 2017).

### **TN and TP testing**

TN and TP were tested using a SmartChem 140 Discrete Analyser (Figure S1). Additionally, a block digestion system was used for digestion of samples for total kjeldahl nitrogen (TKN) and TP. SmartChem 140 Discrete Analyser was used for nitrite nitrogen ( $\text{NO}_2^-$ ), nitrate nitrogen ( $\text{NO}_3^-$ ) and TKN testing. TN was obtained by the addition of TKN,  $\text{NO}_2^-$  and  $\text{NO}_3^-$ .

A number of test methods are included in a single run by the SmartChem 140 Discrete Analyser. The calibration of each test method was inspected separately while the instrument was in operation. When the concentration of the analyte in the sample was above the method detection range, the samples were diluted automatically. In addition, sample blanks and quality control solutions were included during the testing process. In terms of SmartChem 140, the range of measurement for  $\text{NO}_2^-$ ,  $\text{NO}_3^-$  and TKN are 0.01-1.00mg/L, 0.02-20 mg/L and 0.10-20.0 mg/L, respectively, while the ranges of measurement for TP were 0.063-5.0 mg/L. The test methods for  $\text{NO}_2^-$ ,  $\text{NO}_3^-$ , TKN and TP were 4500- $\text{NO}_2$ -B, 4500- $\text{NO}_3$ -E, 4500-Norg-B and 4500-P-B, respectively, specified in the Standards Methods for Water and Wastewater (APHA 2017).

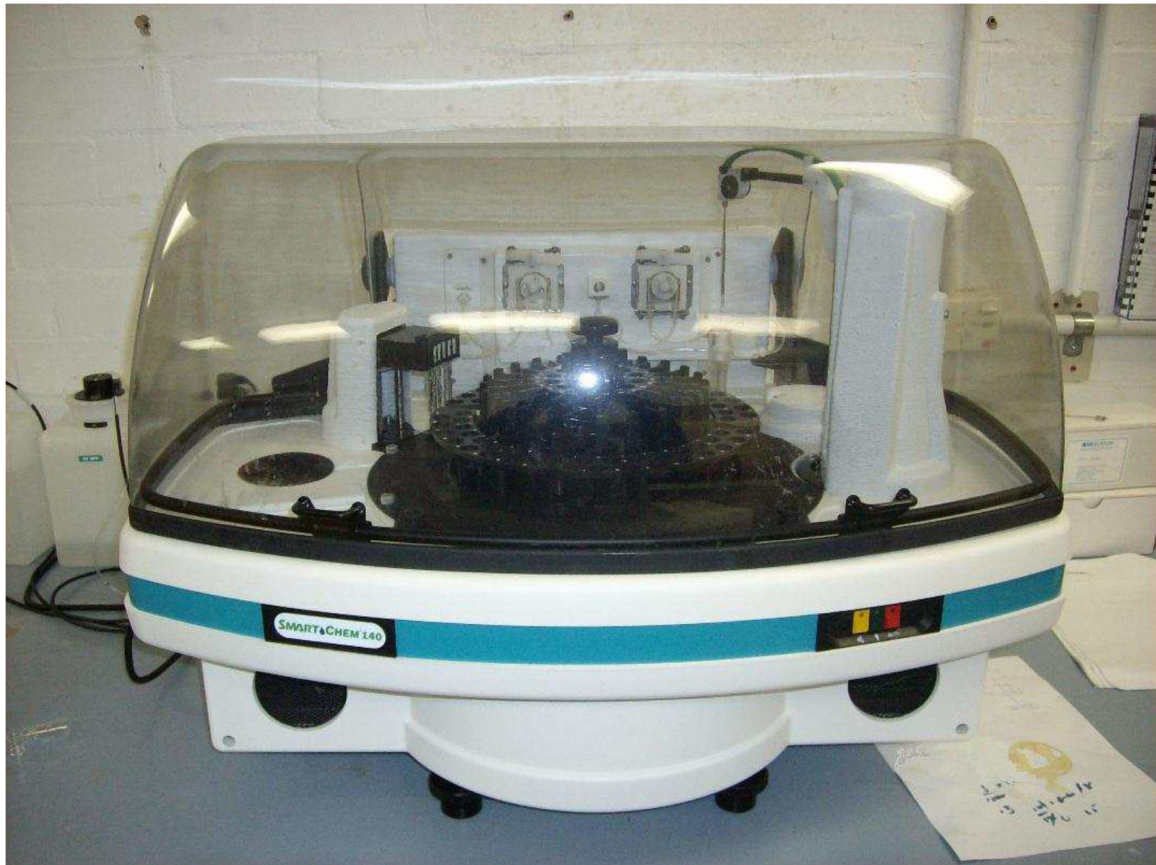

**Figure S1 SmartChem 140 Discrete Analyser**

## PROMETHEE method

PROMETHEE (Preference Ranking Organisation Method for Enrichment Evaluation) is an unsupervised method for rank-ordering objects (Keller *et al.* 1991). Each variable (such as average values and CV values of peak flow reduction, runoff volume reduction, outflow pollutant EMCs and outflow pollutant loads in this study) has to be modelled by; (i) supplying a preference function (Linear, V-shape and Usual functions) and thresholds to indicate how objects are to be compared; (ii) indicating how the objects are to be ordered: top-down (maximised) or bottom-up (minimised) and, (iii) supplying a weighting to reflect the importance of one criterion over another (this was set as 1 in this study, as all variables were equally important).

A set of net ranking outflow values,  $\Phi$ , are computed for each object (the three WSUD systems in this study) on the basis of the partial ranking outflow indices,  $+\Phi$  and  $-\Phi$ . The objects are rank-ordered from the most preferred one (the most positive (+)  $\Phi$  value) to the least well performing one (the most negative (–)  $\Phi$  value). A large difference between two net ranking outflow values,  $\Phi$ , indicates that the two objects are dissimilar. Generally, 10% of the difference of  $\Phi$  values between the most preferred objects and the least well performing object is considered as the threshold to compare the two objects. Two objects are seen as similar if the difference in  $\Phi$  values between them is smaller than 10% of the difference between the highest and lowest  $\Phi$  values. DecisionLab software (DecisionLab 2000) was used for PROMETHEE analysis in the research study.



## **Information about the three WSUD systems**

### **Constructed wetland**

The constructed wetland contains a sedimentation pond, two wetland cells and an overflow bypass system (see Figure S2). There were two pipes which conveyed stormwater to the wetland from two separate sub-catchments. The larger pipe (750 mm diameter) conveyed stormwater from the larger sub-catchment while the smaller pipe (300 mm diameter) conveyed stormwater from the smaller sub-catchment. Consequently, two stormwater monitoring stations were required for the wetland inlets. Stormwater entering the constructed wetland was pre-treated in the sedimentation pond prior to receiving further treatment in the wetland cells. A cell inlet control pit at the pond outlet ensures that the stormwater enters the cells slowly because high flow might disturb the cells and vegetation. Additionally, the maximum inflow rate which was allowed to enter the wetland cells was controlled by the bypass weir. A 7 m wide bypass with a broad crested weir controlled the runoff level in the pond and once the level was exceeded, the excess runoff entered the receiving water through the bypass channel. Stormwater passing the sedimentation pond was further treated as it flows through wetland cells 1 and 2, before it overflows through a PVC riser. From the outlet control pit, the runoff flows through the outlet pipe to the wetland outlet station where the flow was measured and the samples were collected.

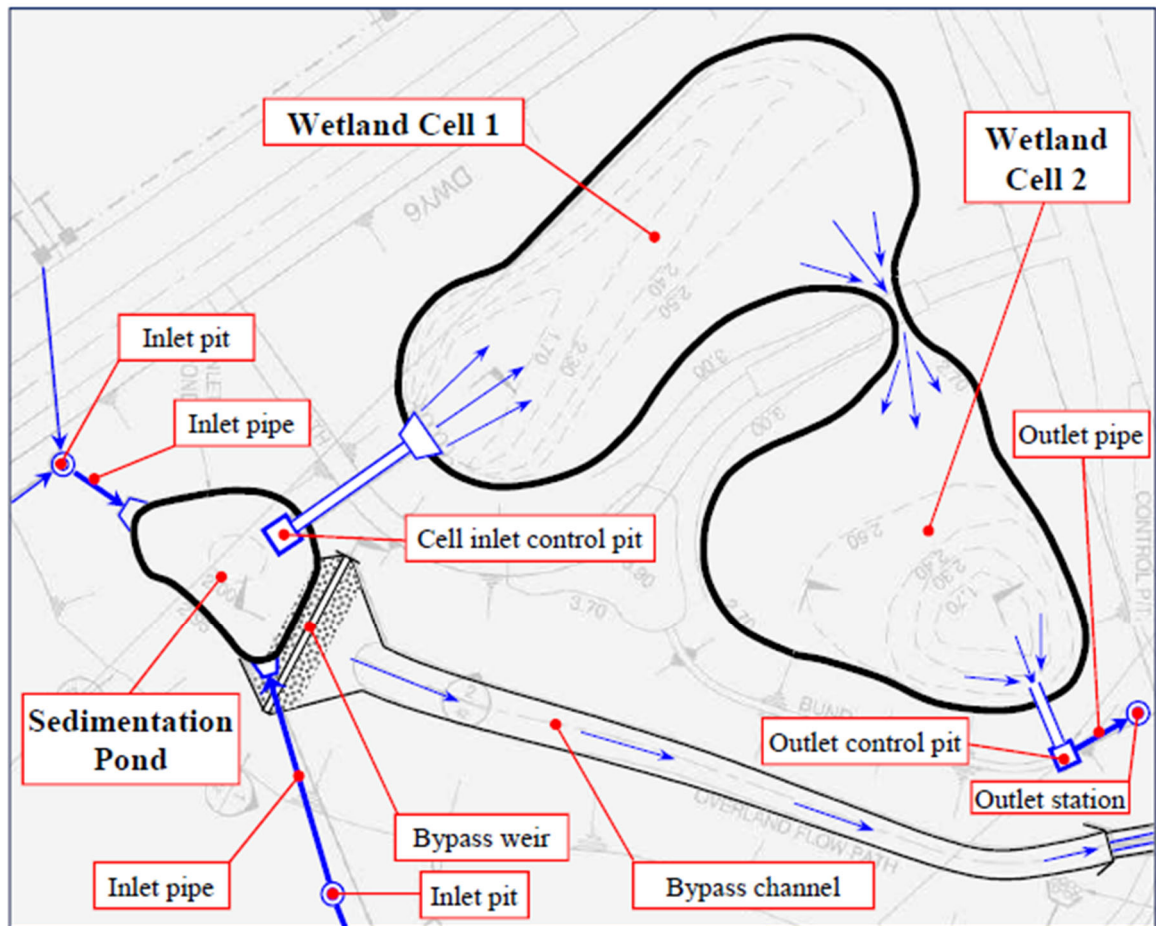

**Figure S2 Constructed wetland configuration (Adapted from Mangangka, 2013)**

### **Bioretention basin**

The stormwater from the contributing catchment flows through a drainage network to the bioretention basin inlet where the stormwater was monitored. A v-notch weir was set-up at the bioretention basin inlet to monitor the stormwater flow, and an automatic sampler was used to collect samples for water quality analysis. The inlet drained the stormwater from the catchment into the bioretention basin where it receives treatment by filtration through the engineered filter media.

The bioretention basin area was 248 m<sup>2</sup> with a grass bed surface. The grass maintained the porosity of the bioretention surface. The filter media with 0.8 m thickness promoted stormwater treatment through infiltration. The treated stormwater which infiltrated and passes through the filter media drains to the 0.2 m thick drainage layer underneath the filter media consisting of granular material (see Figure S3). The bioretention basin has a network of perforated pipes in the drainage layer which

conveyed infiltrated stormwater to the bottom part of the outlet control pit. Perforated pipes are installed at the bottom of the drainage layer with 0.5% slope. The top weir of the outlet control pit is designed 10 cm above the elevation of the surface of the bioretention basin. This allows stormwater ponding up to 10 cm on the surface of the bioretention basin. The outlet control pit is utilised to be a bypass control. When the depth of stormwater exceeds 10 cm, it bypasses into the pit and no treatment is provided.

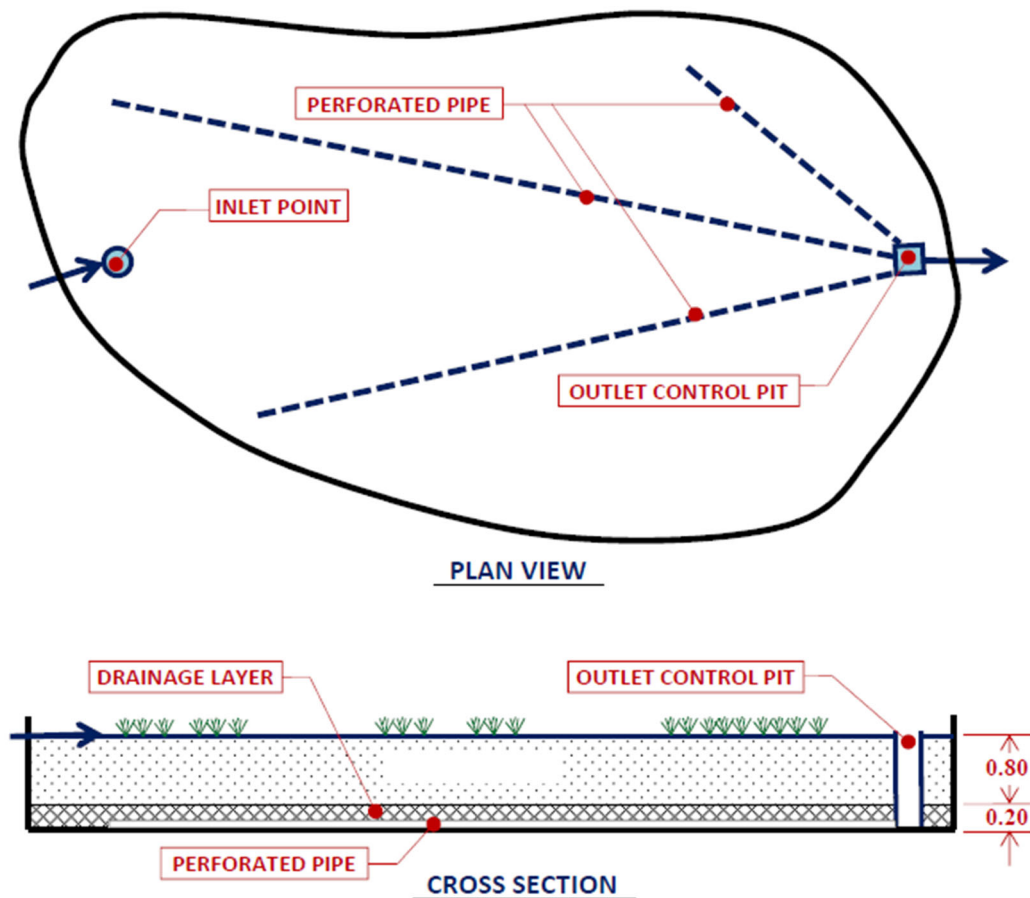

**Figure S3 Bioretention basin configuration (Adapted from Mangangka, 2013)**

## Roadside swale

Bioretention swales are 1 m wide (see Figure S4) and run down either side of the street. They receive stormwater from houses, gardens and the road. In total, the bioretention swales are 2.9 % of the contributing catchment area (9560 m<sup>2</sup>), of which 51% is impervious area. Flush kerbing allows stormwater to flow from the road into the swale for treatment. Runoff from roofs is conveyed via a PVC pipe to a small bubbler pit in the middle of the swale where stormwater exits into the swale. A culvert receives all stormwater inputs from the swales.

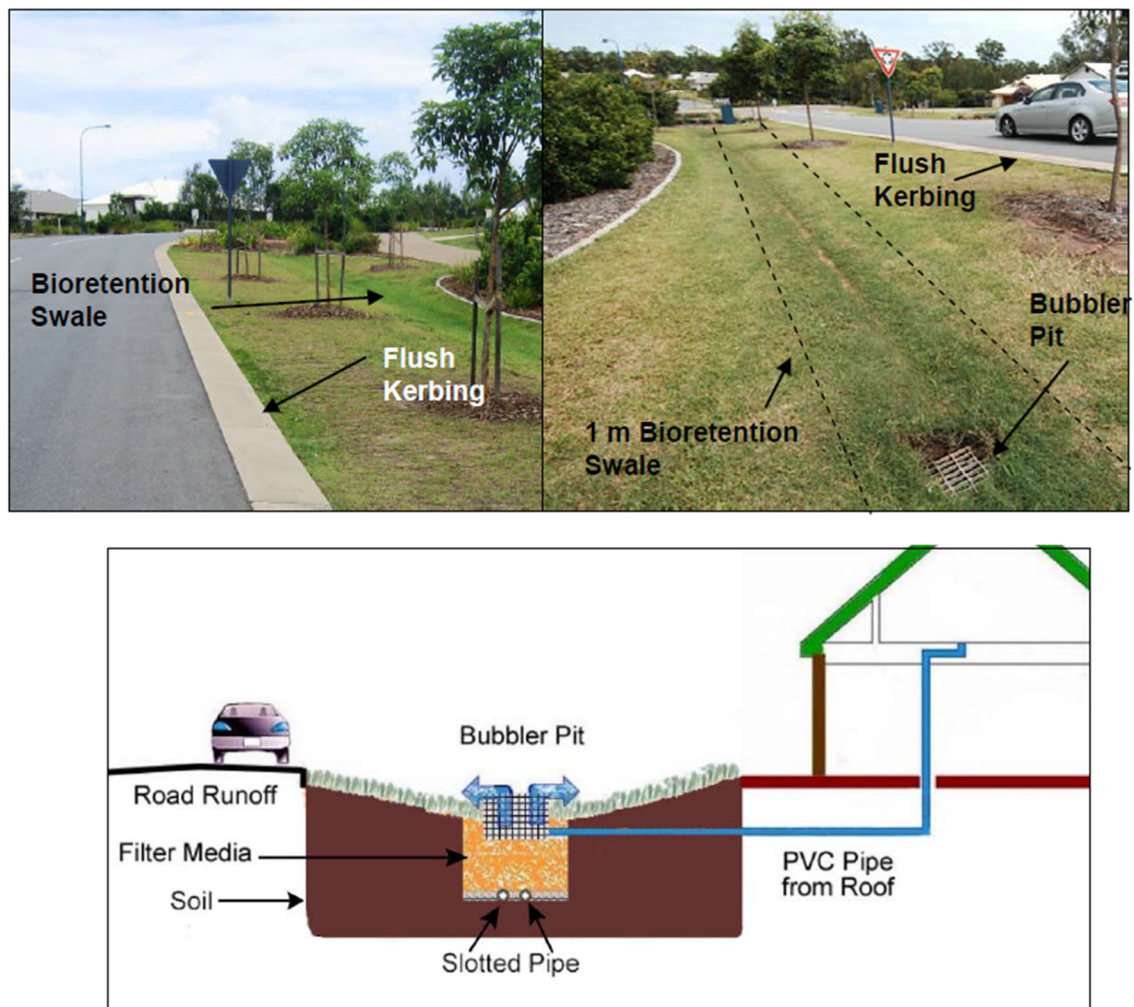

**Figure S4 The roadside swale (Adapted from Parker, 2009)**

## References

APHA, Standard methods for the examination of Water and Wastewater, American Public Health Association: Washington DC, 2017.

Keller, H. R., Massart, D. L. Brans, J. P. Multicriteria decision making: A case study. *Chemometr Intell Lab* 1991, 11, 175-189.

Mangangka, I.R. Role of hydraulic factors in constructed wetland and bioretention basin treatment performance, PhD thesis, Queensland University of Technology, 2013, Brisbane, Australia.

Parker, N. Assessing the effectiveness of water sensitive urban design in Southeast Queensland, Master thesis, Queensland University of Technology, 2009, Brisbane, Australia.
